# Supplementary material for: Metabarcoding of Fecal Samples to Determine Herbivore Diets: A Case Study of the Endangered Pacific Pocket Mouse
Source: PLoS One. 2016 Nov 16;11(11):e0165366. doi: 10.1371/journal.pone.0165366 (PMC5112926; doi:10.1371/journal.pone.0165366)
Supplement: S5 Table — Plants are listed from most to least prevalent across all samples. The average proportion across samples and the simulation match percentages for each genus are also presented. (XLSX) [file pone.0165366.s008.xlsx]

## Sheet: Sheet1
S5 Table Plant genera identified in samples across and within each field site using the ITS gene. Presence = the total number of samples in which each genus was recovered (at greater than 1% relative proportion). Plant genera are listed from most to least common. The average relative proportion across samples and the simulation match percentages for each genus are presented. Also included is the …
					Population	Santa Margarita (Oscar 1)																		Santa Margarita (Edson)																			San Onofre
					Season	Spring											Summer							Spring										Summer									Spring					Summer
Growth Form	Family	Genus	Simulated match success	Presence	Avg. prop of sample	PPM57	PPM43	PPM59	PPM36	PPM44	PPM70	PPM09* 4 pellets	PPM10* 1 pellet	PPM07* 1 pellet	PPM08* 2 pellets	PPM69	PPM20	PPM21	PPM61	PPM55	PPM50	PPM46	PPM62	PPM17	PPM15	PPM16	PPM11** 1 pellet	PPM12** 2 pellets	PPM13** 4 pellets	PPM14** 1 pellet	PPM34	PPM35	PPM60	PPM33† 4 pellets	PPM32† 2 pellets	PPM31† 1 pellet	PPM49	PPM53	PPM54	PPM47	PPM63	PPM48	PPM18	PPM19	PPM41	PPM42	PPM37	PPM22	PPM51
grass	Poaceae	Panicum	1	39	22.873	64.1785	2.67857	1.31292	2.29155	70.2303	6.45926	39.8083	12.9982	13.2683	29.947	0	0	22.9129	17.4418	45.342	56.348	17.6232	0	25.0281	12.1781	0	0	30.3304	12.176	20.6489	27.4164	54.556	51.8457	42.2869	25.5932	57.7625	8.16198	67.3123	25.472	5.21333	0	13.5767	0	19.0568	2.92973	39.3132	66.2944	0	58.6603
forb	Fabaceae	Vicia	0.97	36	9.71232	16.9854	29.4643	7.6995	36.6455	9.12829	8.53937	0	3.66513	27.0934	0	0	0	2.88354	5.44109	19.0034	6.5384	0	2.12652	1.25357	0	17.8502	0	0	8.76858	0	17.0017	3.15279	19.947	2.56184	21.3718	2.40964	40.6746	0	0	0	0	5.39021	2.05347	0	0	9.90724	5.89987	42.0091	29.7547
forb	Convolvulaceae	Calystegia	0.91	27	15.1109	0	0	6.32872	0	0	32.2598	0	0	0	0	28.2957	0	0	0	6.74714	7.29017	0	70.3443	7.3874	65.1222	35.173	0	66.6487	60.3736	58.6538	1.12009	0	10.2632	46.8971	26.8578	24.5095	2.50722	28.6365	47.6892	31.949	16.5583	23.57	42.6892	0	0	0	0	0	0
forb	Geraniaceae	Erodium	1	22	5.1639	0	0	12.2925	28.0377	0	19.9526	7.31668	0	0	11.2964	5.07645	0	0	0	0	0	0	0	2.04029	21.4696	1.39421	7.11911	3.0209	6.85436	15.0293	38.1055	36.1358	0	8.2542	2.94472	4.37177	1.25361	2.8991	0	0	0	0	0	0	0	31.8532	0	0	0
forb	Fabaceae	Acmispon	0.93	19	7.44551	0	6.25	0	0	1.04167	23.5836	4.72704	8.76227	0	6.53012	0	0	0	0	0	0	24.5875	0	0	0	0	0	0	0	0	0	0	0	0	0	0	0	0	0	1.61575	10.3304	0	0	23.1076	43.2288	2.54589	0	2.10046	0
forb	Euphorbiaceae	Croton	1	17	6.49854	0	1.4881	0	0	1.42544	0	0	0	0	0	0	0	43.007	50.2626	6.56144	0	29.0363	0	0	0	0	0	0	0	0	0	0	0	0	0	0	0	0	0	3.0106	42.6892	0	0	35.5767	44.6965	3.29584	4.504	0	0
forb	Asteraceae	Sonchus	1	16	1.25957	0	0	4.45503	5.18005	0	1.81553	0	0	0	0	0	0	4.06199	0	0	0	0	0	5.35575	0	10.7636	0	0	4.39416	0	0	0	0	0	4.07684	0	0	0	0	0	3.05837	0	0	0	0	4.99309	0	7.57991	0
forb	Fabaceae	Trifolium	1	15	0.473559	0	3.86905	1.17495	1.44425	0	0	0	0	1.45891	0	0	0	0	0	1.29991	0	0	0	0	0	1.14137	0	0	0	0	1.00883	0	1.1422	0	1.52355	0	2.46212	0	0	0	0	0	0	0	0	0	0	1.91781	1.72763
forb	Brassicaceae	Brassica	0.99	13	2.56179	12.3998	1.78571	34.0558	24.2442	0	0	0	17.2692	0	0	0	0	0	7.60238	9.40885	0	0	0	0	0	0	0	0	2.02605	2.00207	0	0	0	0	0	1.92771	0	0	0	0	0	0	0	0	0	0	0	0	0
forb	Amaranthaceae	Chenopodium	1	12	6.44665	0	0	22.017	0	0	0	48.1479	50.4356	0	38.106	48.4617	0	0	19.2521	0	0	0	0	0	0	0	67.254	0	0	0	0	0	0	0	0	0	0	0	0	0	0	0	0	0	0	4.87468	0	0	0
forb	Asteraceae	Symphyotrichum	1	12	0.807985	0	1.4881	0	0	0	0	0	0	0	0	0	0	3.42744	0	0	3.21974	0	0	2.74056	0	2.37665	0	0	0	0	0	0	4.16322	0	3.39034	0	0	0	2.30239	5.12497	0	0	0	0	0	0	0	0	0
shrub/tree	Fabaceae	Acacia	0.34	9	0.649656	0	0	0	0	0	2.67311	0	1.19668	0	0	0	0	0	0	0	0	2.8596	0	0	0	0	0	0	0	0	0	0	0	0	0	0	0	0	0	0	0	0	0	0	3.50789	0	0	0	0
forb	Polygonaceae	Chorizanthe	0.87	8	1.17501	3.57804	0	0	0	0	0	0	0	0	0	0	0	0	0	0	21.0248	1.3969	14.7611	0	0	12.7429	0	0	0	0	0	0	0	0	0	0	0	0	0	0	0	0	0	0	0	0	0	0	0
forb	Asteraceae	Ambrosia	0.95	8	1.65319	0	0	0	0	0	0	0	1.22672	25.9323	2.00964	0	14.9776	0	0	0	0	0	0	19.145	0	10.9947	0	0	0	0	0	0	0	0	0	0	0	0	0	0	0	0	5.17489	0	0	0	0	0	0
forb	Asteraceae	Taraxacum	1	7	1.16161	0	0	2.63919	0	0	0	0	0	0	0	0	0	0	0	0	1.84975	0	0	0	0	0	0	0	0	0	0	0	0	0	1.23449	0	0	0	0	0	3.74213	0	0	0	0	0	0	42.5571	0
shrub/tree	Juglandaceae	Carya	1	6	1.09467	0	0	0	0	13.898	0	0	0	0	0	3.89241	0	0	0	0	0	10.9829	0	0	0	0	0	0	0	0	0	0	0	0	6.00385	0	17.6046	0	0	0	0	0	0	0	0	0	4.54122	0	0
shrub/tree	Fabaceae	Caragana	1	6	0.604912	0	0	0	0	0	0	0	0	0	0	0	0	0	0	0	0	0	0	0	0	0	0	0	0	0	0	0	0	0	0	5.8864	8.47763	0	0	0	0	0	0	0	0	0	0	0	9.85735
shrub/tree	Rosaceae	Prunus	1	4	0.517231	0	0	0	0	0	0	0	0	4.95943	8.81928	0	10.2684	0	0	0	0	0	0	0	0	0	0	0	0	0	0	0	0	0	0	0	0	0	0	0	0	0	0	2.84889	0	0	0	0	0
shrub/tree	Fagaceae	Quercus	0.87	5	1.14104	0	37.2024	6.86279	0	0	0	0	0	1.28626	0	0	0	0	0	0	0	0	0	0	0	0	0	0	0	0	0	0	12.6386	0	0	0	1.3438	0	0	0	0	0	0	0	0	0	0	0	0
forb	Brassicaceae	Raphanus	1	5	0.229989	0	0	0	0	0	0	0	0	0	0	0	0	2.55115	0	0	0	0	0	0	0	0	0	0	0	0	0	3.24518	0	0	1.71023	3.13253	0	0	0	0	1.32035	0	0	0	0	0	0	0	0
forb	Asteraceae	Grindelia	1	4	0.451291	0	0	0	0	0	0	0	0	0	0	0	5.11033	0	0	0	0	0	0	4.8111	0	0	0	0	0	0	0	0	0	0	0	0	0	0	0	0	0	0	0	7.95486	0	0	0	0	0
forb	Asteraceae	Helianthus	1	5	0.529262	0	0	0	0	0	0	0	0	0	0	0	0	2.16697	0	0	0	0	0	0	0	0	0	0	1.48007	0	0	0	0	0	0	0	0	1.15204	21.0464	0	0	0	0	0	0	0	0	0	0
grass	Poaceae	Stipa	0.98	5	0.217124	0	0	0	0	1.48026	0	0	0	0	0	0	0	0	0	0	0	0	0	0	1.23011	0	0	0	2.71017	3.66586	0	0	0	0	0	0	0	0	0	0	0	2.20406	0	0	0	0	0	0	0
shrub/tree	Rhamnaceae	Rhamnus	1	5	0.259517	0	0	0	0	0	4.71672	0	0	1.98981	0	0	0	0	0	0	3.72917	0	0	0	0	0	0	0	0	0	0	0	0	0	0	0	1.09127	0	0	0	0	0	0	0	0	0	0	0	0
forb	Convolvulaceae	Convolvulus	0.61	4	1.4438	0	0	0	0	0	0	0	0	0	0	0	0	0	0	0	0	0	0	0	0	0	0	0	0	0	0	0	0	0	0	0	4.53644	0	0	35.6286	0	33.7656	1.14679	0	0	0	0	0	0
forb	Boraginaceae	Phacelia	1	3	0.62768	0	0	0	0	0	0	0	0	0	0	0	0	0	0	0	0	0	0	0	0	0	0	0	0	0	0	0	0	0	0	0	0	0	0	0	0	0	0	5.86292	0	0	17.4949	0	0
forb	Asteraceae	Cirsium	1	4	0.157289	0	0	0	1.07837	0	0	0	0	0	0	0	0	0	0	0	0	0	0	3.25927	0	0	0	0	1.21695	0	0	0	0	0	0	0	2.62446	0	0	0	0	0	0	0	0	0	0	0	0
forb	Crassulaceae	Crassula	0.94	3	0.37545	0	0	0	0	0	0	0	0	0	0	0	0	0	0	0	0	0	0	0	0	0	0	0	0	0	15.3475	2.91027	0	0	0	0	0	0	0	0	0	0	0	0	0	0	1.26559	0	0
forb	Apiaceae	Foeniculum	1	3	1.13239	0	0	0	0	0	0	0	0	0	0	0	0	0	0	0	0	0	0	0	0	5.54071	0	0	0	0	0	0	0	0	0	0	0	0	0	0	0	4.40813	48.9356	0	0	0	0	0	0
forb	Convolvulaceae	Cressa	0.26	3	0.713544	0	0	0	0	0	0	0	0	0	0	0	0	0	0	0	0	0	0	0	0	0	0	0	0	0	0	0	0	0	0	0	2.56133	0	0	17.4577	0	17.0852	0	0	0	0	0	0	0
shrub/tree	Oleaceae	Ligustrum	1	3	0.226432	0	0	0	0	0	0	0	3.21951	0	0	0	0	0	0	0	0	0	0	0	0	0	0	0	0	0	0	0	0	0	0	0	0	0	0	0	4.03853	0	0	0	0	0	0	0	0
shrub/tree	Oleaceae	Fraxinus	1	3	0.313512	0	13.6905	0	0	0	0	0	0	0	0	0	0	0	0	0	0	0	0	0	0	0	0	0	0	0	0	0	0	0	0	0	1.41595	0	0	0	0	0	0	0	0	0	0	0	0
forb	Cleomaceae	Peritoma	1	2	1.01566	0	0	0	0	0	0	0	0	0	0	0	47.1774	0	0	0	0	0	0	0	0	0	0	0	0	0	0	0	0	0	0	0	0	0	0	0	0	0	0	0	5.63709	0	0	0	0
shrub/tree	Nyctaginaeae	Mirabilis	0.77	2	0.882918	0	0	0	0	0	0	0	0	0	0	0	0	0	0	0	0	0	0	0	0	0	0	0	0	0	0	0	0	0	0	0	0	0	0	0	0	0	0	0	0	0	0	0	0
forb	Asteraceae	Rafinesquia	1	2	0.246364	0	0	0	0	0	0	0	0	0	0	0	0	0	0	0	0	0	0	4.43071	0	0	0	0	0	0	0	0	0	0	0	0	0	0	0	0	0	0	0	0	0	0	0	0	0
forb	Asteraceae	Baileya	1	2	0.0870674	0	0	0	0	0	0	0	0	0	0	0	0	0	0	0	0	0	0	3.20308	0	0	0	0	0	0	0	0	0	0	0	0	0	0	0	0	0	0	0	0	0	0	0	0	0
forb	Apiaceae	Cicuta	1	2	0.276918	0	0	0	0	0	0	0	0	0	0	0	0	1.6317	0	0	0	0	12.768	0	0	0	0	0	0	0	0	0	0	0	0	0	0	0	0	0	0	0	0	0	0	0	0	0	0
forb	Asteraceae	Hirschfeldia	1	1	0.107543	0	0	0	0	0	0	0	0	0	0	0	0	0	0	0	0	0	0	0	0	0	0	0	0	0	0	0	0	0	0	0	0	0	0	0	0	0	0	5.59226	0	0	0	0	0
forb	Brassicaceae	Sinapis	0.99	2	0.14745	0	0	0	0	0	0	0	0	0	0	0	0	0	0	2.63076	0	0	0	0	0	0	0	0	0	0	0	0	0	0	0	0	0	0	0	0	0	0	0	0	0	0	0	0	0
forb	Asteraceae	Heterotheca	1	2	0.324224	0	0	0	0	0	0	0	0	0	0	0	0	0	0	0	0	0	0	0	0	0	0	0	0	0	0	0	0	0	0	0	0	0	0	0	0	0	0	0	0	3.21689	0	0	0
forb	Cucurbitaceae	Citrullus	1	2	0.121435	0	0	0	0	0	0	0	0	0	0	0	0	0	0	1.02136	0	0	0	0	0	0	0	0	0	0	0	0	0	0	5.29327	0	0	0	0	0	0	0	0	0	0	0	0	0	0
forb	Polygonaceae	Eriogonum	0.81	2	0.0938343	0	2.08333	0	0	2.79605	0	0	0	0	0	0	0	0	0	0	0	0	0	0	0	0	0	0	0	0	0	0	0	0	0	0	0	0	0	0	0	0	0	0	0	0	0	0	0
forb	Asteraceae	Solidago	1	2	0.0547467	1.76846	0	0	1.07837	0	0	0	0	0	0	0	0	0	0	0	0	0	0	0	0	0	0	0	0	0	0	0	0	0	0	0	0	0	0	0	0	0	0	0	0	0	0	0	0
grass	Poaceae	Setaria	1	1	0.324386	0	0	0	0	0	0	0	0	16.8681	0	0	0	0	0	0	0	0	0	0	0	0	0	0	0	0	0	0	0	0	0	0	0	0	0	0	0	0	0	0	0	0	0	0	0
grass	Poaceae	Avena	0.96	1	0.0947926	0	0	0	0	0	0	0	0	4.92921	0	0	0	0	0	0	0	0	0	0	0	0	0	0	0	0	0	0	0	0	0	0	0	0	0	0	0	0	0	0	0	0	0	0	0
forb	Plantaginaceae	Plantago	1	1	0.195267	0	0	0	0	0	0	0	0	0	0	0	0	0	0	0	0	0	0	10.1539	0	0	0	0	0	0	0	0	0	0	0	0	0	0	0	0	0	0	0	0	0	0	0	0	0
shrub/tree	Elaeagnaceae	Elaeagnus	1	1	0.333795	0	0	0	0	0	0	0	0	0	0	0	0	17.3573	0	0	0	0	0	0	0	0	0	0	0	0	0	0	0	0	0	0	0	0	0	0	0	0	0	0	0	0	0	0	0
forb	Liliaceae	Dichelostemma	1	1	0.229041	0	0	0	0	0	0	0	0	0	0	0	0	0	0	0	0	0	0	0	0	0	0	0	0	0	0	0	0	0	0	0	0	0	0	0	11.9101	0	0	0	0	0	0	0	0
forb	Iridaceae	Sisyrinchium	NI	1	0.274495	0	0	0	0	0	0	0	0	0	0	14.2737	0	0	0	0	0	0	0	0	0	0	0	0	0	0	0	0	0	0	0	0	0	0	0	0	0	0	0	0	0	0	0	0	0
forb	Brassicaceae	Caulanthus	0.99	1	0.0425819	0	0	0	0	0	0	0	0	2.21426	0	0	0	0	0	0	0	0	0	0	0	0	0	0	0	0	0	0	0	0	0	0	0	0	0	0	0	0	0	0	0	0	0	0	0
forb	Asteraceae	Lactuca	1	1	0.152706	0	0	0	0	0	0	0	0	0	0	0	0	0	0	0	0	0	0	0	0	0	7.94073	0	0	0	0	0	0	0	0	0	0	0	0	0	0	0	0	0	0	0	0	0	0
forb	Boraginaceae	Cryptantha	1	1	0.122164	0	0	0	0	0	0	0	0	0	0	0	0	0	0	0	0	0	0	0	0	0	0	0	0	0	0	0	0	0	0	0	0	0	0	0	6.35252	0	0	0	0	0	0	0	0
forb	Amaranthaceae	Kochia	1	1	0.182964	0	0	0	0	0	0	0	0	0	0	0	0	0	0	0	0	0	0	9.51414	0	0	0	0	0	0	0	0	0	0	0	0	0	0	0	0	0	0	0	0	0	0	0	0	0
forb	Polygonaceae	Nemacaulis	1	1	0.0209589	1.08986	0	0	0	0	0	0	0	0	0	0	0	0	0	0	0	0	0	0	0	0	0	0	0	0	0	0	0	0	0	0	0	0	0	0	0	0	0	0	0	0	0	0	0
forb	Cucurbitaceae	Cucurbita	1	1	0.16805	0	0	0	0	0	0	0	0	0	0	0	0	0	0	0	0	0	0	0	0	0	8.7386	0	0	0	0	0	0	0	0	0	0	0	0	0	0	0	0	0	0	0	0	0	0
grass	Poaceae	Bromus	0.94	1	0.0668547	0	0	0	0	0	0	0	0	0	0	0	0	0	0	0	0	0	0	0	0	0	3.47644	0	0	0	0	0	0	0	0	0	0	0	0	0	0	0	0	0	0	0	0	0	0
grass	Poaceae	Alopecurus	1	1	0.0319325	0	0	0	0	0	0	0	0	0	0	0	0	0	0	0	0	0	0	0	0	0	0	0	0	0	0	0	0	0	0	0	0	0	0	0	0	0	0	0	0	0	0	0	0
forb	Onagraceae	Camissoniopsis	0.94	1	0.121859	0	0	0	0	0	0	0	0	0	0	0	0	0	0	0	0	6.33667	0	0	0	0	0	0	0	0	0	0	0	0	0	0	0	0	0	0	0	0	0	0	0	0	0	0	0
forb	Onagraceae	Camissonia	0.97	1	0.105994	0	0	0	0	0	0	0	0	0	0	0	0	0	0	0	0	5.51169	0	0	0	0	0	0	0	0	0	0	0	0	0	0	0	0	0	0	0	0	0	0	0	0	0	0	0
grass	Poaceae	Poa	0.97	1	0.0546163	0	0	0	0	0	0	0	0	0	0	0	0	0	0	0	0	0	0	0	0	0	2.84005	0	0	0	0	0	0	0	0	0	0	0	0	0	0	0	0	0	0	0	0	0	0
forb	Asteraceae	Corethrogyne	0.65	1	0.294826	0	0	0	0	0	0	0	0	0	0	0	15.331	0	0	0	0	0	0	0	0	0	0	0	0	0	0	0	0	0	0	0	0	0	0	0	0	0	0	0	0	0	0	0	0
grass	Poaceae	Aira	0.82	1	0.0505977	0	0	0	0	0	0	0	0	0	0	0	0	0	0	0	0	0	0	0	0	0	2.63108	0	0	0	0	0	0	0	0	0	0	0	0	0	0	0	0	0	0	0	0	0	0
grass	Poaceae	Phleum	1	1	0.0223385	0	0	1.1616	0	0	0	0	0	0	0	0	0	0	0	0	0	0	0	0	0	0	0	0	0	0	0	0	0	0	0	0	0	0	0	0	0	0	0	0	0	0	0	0	0
shrub/tree	Salicaceae	Salix	1	1	0.0693751	0	0	0	0	0	0	0	0	0	0	0	0	0	0	0	0	0	0	0	0	0	0	0	0	0	0	0	0	0	0	0	3.6075	0	0	0	0	0	0	0	0	0	0	0	0
forb	Asteraceae	Dieteria	0.67	1	0.137218	0	0	0	0	0	0	0	0	0	0	0	7.13535	0	0	0	0	0	0	0	0	0	0	0	0	0	0	0	0	0	0	0	0	0	0	0	0	0	0	0	0	0	0	0	0
forb	Amaranthaceae	Amaranthus	1	1	0.0632994	0	0	0	0	0	0	0	0	0	3.29157	0	0	0	0	0	0	0	0	0	0	0	0	0	0	0	0	0	0	0	0	0	0	0	0	0	0	0	0	0	0	0	0	0	0
shrub/tree	Fabaceae	Prosopis	1	1	0.0737619	0	0	0	0	0	0	0	0	0	0	0	0	0	0	0	0	0	0	0	0	0	0	0	0	0	0	0	0	0	0	0	0	0	0	0	0	0	0	0	0	0	0	3.83562	0
grass	Poaceae	Hordeum	1	1	0.0671154	0	0	0	0	0	0	0	0	0	0	0	0	0	0	0	0	0	0	0	0	0	0	0	0	0	0	0	0	0	0	0	0	0	3.49	0	0	0	0	0	0	0	0	0	0
shrub/tree	Anacardiaceae	Malosma	1	1	0.0322536	0	0	0	0	0	0	0	0	0	0	0	0	0	0	0	0	0	0	1.67719	0	0	0	0	0	0	0	0	0	0	0	0	0	0	0	0	0	0	0	0	0	0	0	0	0
forb	Amaranthaceae	Atriplex	1	1	0.0320221	0	0	0	0	0	0	0	0	0	0	0	0	0	0	0	0	1.66515	0	0	0	0	0	0	0	0	0	0	0	0	0	0	0	0	0	0	0	0	0	0	0	0	0	0	0
shrub/tree	Moraceae	Ficus	1	1	0.0388977	0	0	0	0	0	0	0	0	0	0	0	0	0	0	0	0	0	0	0	0	2.02268	0	0	0	0	0	0	0	0	0	0	0	0	0	0	0	0	0	0	0	0	0	0	0
forb	Apiaceae	Daucus	0.75	1	0.15356	0	0	0	0	0	0	0	0	0	0	0	0	0	0	7.98514	0	0	0	0	0	0	0	0	0	0	0	0	0	0	0	0	0	0	0	0	0	0	0	0	0	0	0	0	0
shrub/tree	Fabaceae	Amorpha	0.68	1	0.0235907	0	0	0	0	0	0	0	1.22672	0	0	0	0	0	0	0	0	0	0	0	0	0	0	0	0	0	0	0	0	0	0	0	0	0	0	0	0	0	0	0	0	0	0	0	0
forb	Asteraceae	Arctium	1	1	0.0322594	0	0	0	0	0	0	0	0	0	0	0	0	0	0	0	0	0	0	0	0	0	0	0	0	0	0	0	0	0	0	0	1.67749	0	0	0	0	0	0	0	0	0	0	0	0
Richness						6	10	11	8	7	8	4	9	10	7	5	6	9	5	9	7	9	4	14	4	10	7	3	9	5	6	5	6	4	11	7	14	4	5	7	9	7	5	7	5	8	6	6	4
* denotes samples comprised of pellets from the same individual
** denotes samples comprised of pellets from the same individual
† denotes samples comprised of pellets from the same individual
[truncated: 8 more columns]
